# Supplementary material
Source: PubMed Central journal article supplement (PMC9885856)
Supplement: ehp10839.s001.acco.pdf [file ehp10839.s001.acco.pdf]

**Note to readers with disabilities:** *EHP* strives to ensure that all journal content is accessible to all readers. However, some figures and Supplemental Material published in *EHP* articles may not conform to [508 standards](#) due to the complexity of the information being presented. If you need assistance accessing journal content, please contact [ehp508@niehs.nih.gov](mailto:ehp508@niehs.nih.gov). Our staff will work with you to assess and meet your accessibility needs within 3 working days.

## **Supplemental Material**

### **Adoption of Point-of-Use Chlorination for Household Drinking Water Treatment: A Systematic Review**

Yoshika S. Crider, Miki Tsuchiya, Magnifique Mukundwa, Isha Ray, and Amy J. Pickering

#### **Table of Contents**

##### **Full search terms**

**Figure S1.** PRISMA flow diagram.

**Figure S2.** Weighted box plots showing the relationship between the type of chlorine product and final measured adoption, restricted to only groups that used free chlorine residual (FCR) or total chlorine to measure adoption. This excludes Opryszko et al (2010), Albert et al (2010), and Sugar et al (2017). Dots show each group average. Groups were weighted by sample size to calculate the 25th, 50th, and 75th percentiles displayed above as the midline and box limits. The whiskers extend to data within 1.5 times the interquartile range (IQR) above and below the 75<sup>th</sup> and 25<sup>th</sup> percentiles. This includes studies that report single-time-point and pooled adoption measures. Summary data are presented in Table S2.

**Figure S3.** Last measured adoption over time by frequency of contact with study staff. The point sizes are scaled to indicate relative sample size (of the group(s) receiving chlorine only). Open circles indicate that the data point is reported as multiple adoption measures combined over the months of follow-up up until the time point shown. Closed circles are a single time-point result. This plot includes all groups listed in Table 1. Data are available in the Supplemental Excel File, Excel Table S1.

**Figure S4.** Last measured adoption over time by type of chlorine POU product. The point sizes are scaled to indicate relative sample size (of the group(s) receiving chlorine only). Open circles indicate that the data point is reported as multiple adoption measures combined over the months of follow-up up until the time point shown. Closed circles are a single time-point result. This plot includes all groups listed in Table 1. Data are available in the Supplemental Excel File, Excel Table S1.

**Figure S5.** Last measured adoption over time by study location. “Institution” includes schools and health care facilities; “Humanitarian” includes an internally displaced persons camp and post-disaster relief. The point sizes are scaled to indicate relative sample size (of the group(s) receiving chlorine only). Open circles indicate that the data point is reported as multiple adoption measures combined over the months of follow-up up until the time point shown. Closed circles are a single time-point result. This plot includes all groups listed in Table 1. Data are available in the Supplemental Excel File, Excel Table S1.

**Table S1.** Summary data for Figure 3 (Weighted (by sample size) box plots showing relationship between contact frequency and final measured adoption).

**Table S2.** Summary data for Figure S2 (Weighted (by sample size) box plots showing relationship between type of chlorine product and final measured adoption).

## References

**Additional File-** Excel Document

## Full search terms

### Set 1

“Drinking water” OR “Potable water” OR “Tap water” OR “Household water” OR “Domestic water”

### Set 2

“Chemical disinfectant” OR Chlorin\* OR Chlorate OR Chlorite OR Disinfec\* OR Hypochlorite OR “Sodium hypochlorite” OR “Calcium hypochlorite” OR “Sodium dichloroisocyanurate” OR NaDCC OR trichlor OR Aquatab OR Waterguard OR WaterGuard OR Klorin OR Pur OR “Water quality” OR “Free residual chlorine” OR “Free chlorine”

### Set 3

Afghanistan OR Benin OR Burkina Faso OR Burundi OR “Central African Republic” OR Chad OR Congo OR Zaire OR Eritrea OR Ethiopia OR Gambia OR Guinea OR Guinea-Bissau OR Haiti OR Korea OR Liberia OR Madagascar OR Malawi OR Mali OR Mozambique OR Nepal OR Niger OR Rwanda OR Sierra Leone OR Somalia OR South Sudan OR Sudan OR Syria OR Tajikistan OR Tanzania OR Togo OR Uganda OR Yemen OR Angola OR Bangladesh OR Bhutan OR Bolivia OR “Cabo Verde” OR “Cape Verde” OR Cambodia OR Cameroon OR Comoros OR Congo OR “Côte d'Ivoire” OR Djibouti OR Egypt OR “El Salvador” OR Swaziland OR Eswatini OR Ghana OR Honduras OR India OR Indonesia OR Kenya OR Kiribati OR Kyrgyzstan OR “Kyrgyz Republic” OR Lao OR Lesotho OR Mauritania OR Micronesia OR Moldova OR Mongolia OR Morocco OR Myanmar OR Burma OR Nicaragua OR Nigeria OR Pakistan OR “Papua New Guinea” OR Philippines OR “São Tomé and Príncipe” OR Senegal OR “Solomon Islands” OR Sudan OR Timor-Leste OR Tunisia OR Ukraine OR Uzbekistan OR Vanuatu OR Vietnam OR “West Bank” OR Gaza OR Zambia OR Zimbabwe OR Albania OR Algeria OR “American Samoa” OR Argentina OR Armenia OR Azerbaijan OR Belarus OR Belize OR “Bosnia and Herzegovina” OR Yugoslavia OR Botswana OR Brazil OR Bulgaria OR China OR Colombia OR “Costa Rica” OR Cuba OR Dominica OR “Dominican Republic” OR Ecuador OR “Equatorial Guinea” OR Fiji OR Gabon OR Georgia OR Grenada OR Guatemala OR Guyana OR Iran OR Iraq OR Jamaica OR Jordan OR Kazakhstan OR Kosovo OR Lebanon OR Libya OR Malaysia OR Maldives OR “Marshall Islands” OR Mauritius OR Mexico OR Montenegro OR Namibia OR Nauru OR “North Macedonia” OR Paraguay OR Peru OR Romania OR Russia OR Samoa OR Serbia OR “South Africa” OR “Sri Lanka” OR “St. Lucia” OR “St. Vincent and the Grenadines” OR Suriname OR Thailand OR Tonga OR Turkey OR Turkmenistan OR Tuvalu OR Venezuela

Source: World Bank, 2019<sup>38</sup>

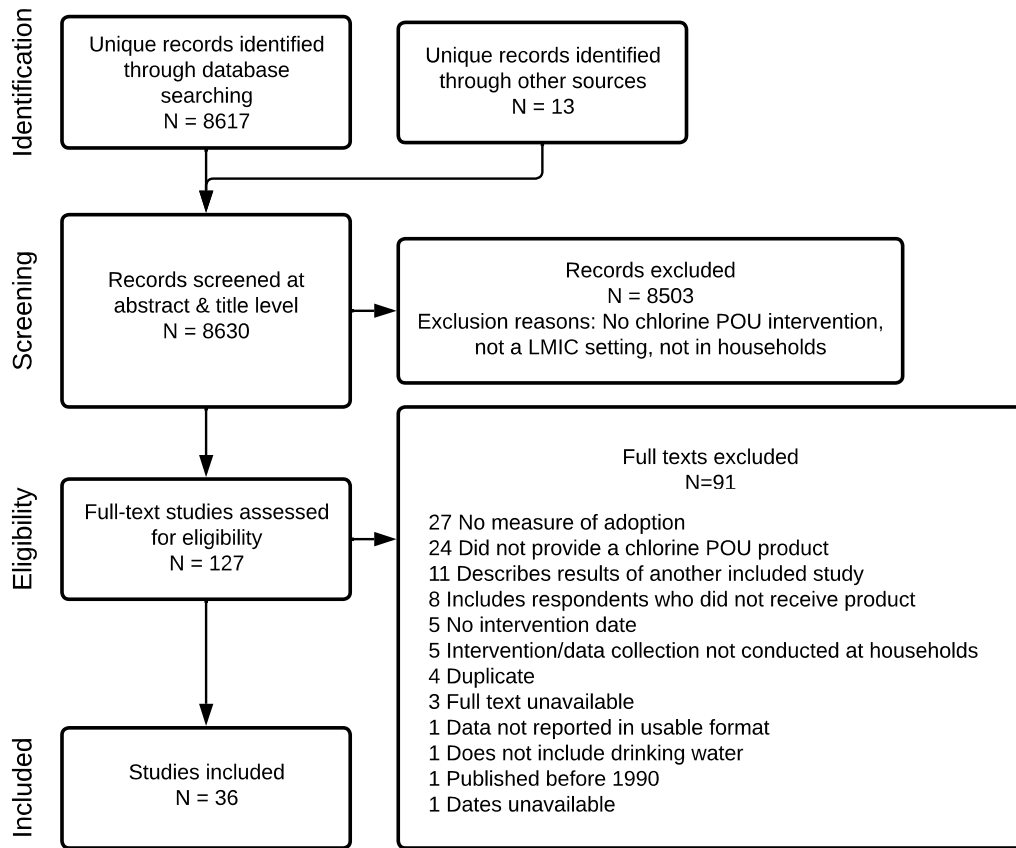

**Figure S1.** PRISMA flow diagram

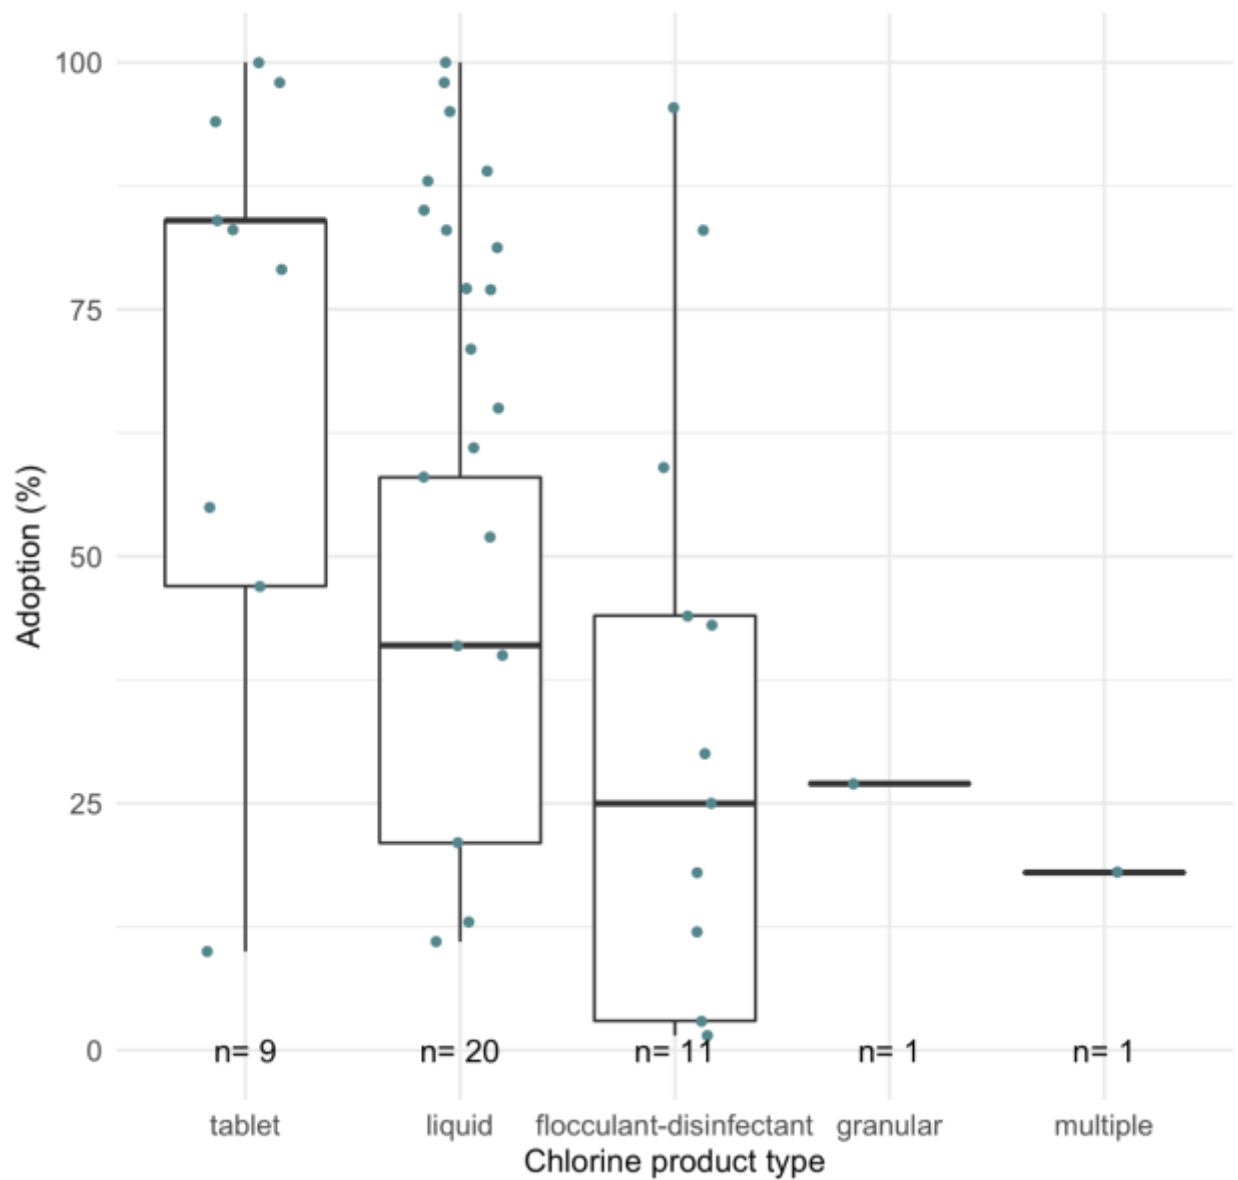

**Figure S2.** Weighted box plots showing the relationship between the type of chlorine product and final measured adoption, restricted to only groups that used free chlorine residual (FCR) or total chlorine to measure adoption. This excludes Opryszko et al (2010)<sup>25</sup>, Albert et al (2010)<sup>1</sup>, and Sugar et al (2017)<sup>36</sup>. Dots show each group average. Groups were weighted by sample size to calculate the 25th, 50th, and 75th percentiles displayed above as the midline and box limits. The whiskers extend to data within 1.5 times the interquartile range (IQR) above and below the 75<sup>th</sup> and 25<sup>th</sup> percentiles. This includes studies that report single-time-point and pooled adoption measures. Summary data are presented in Table S2.

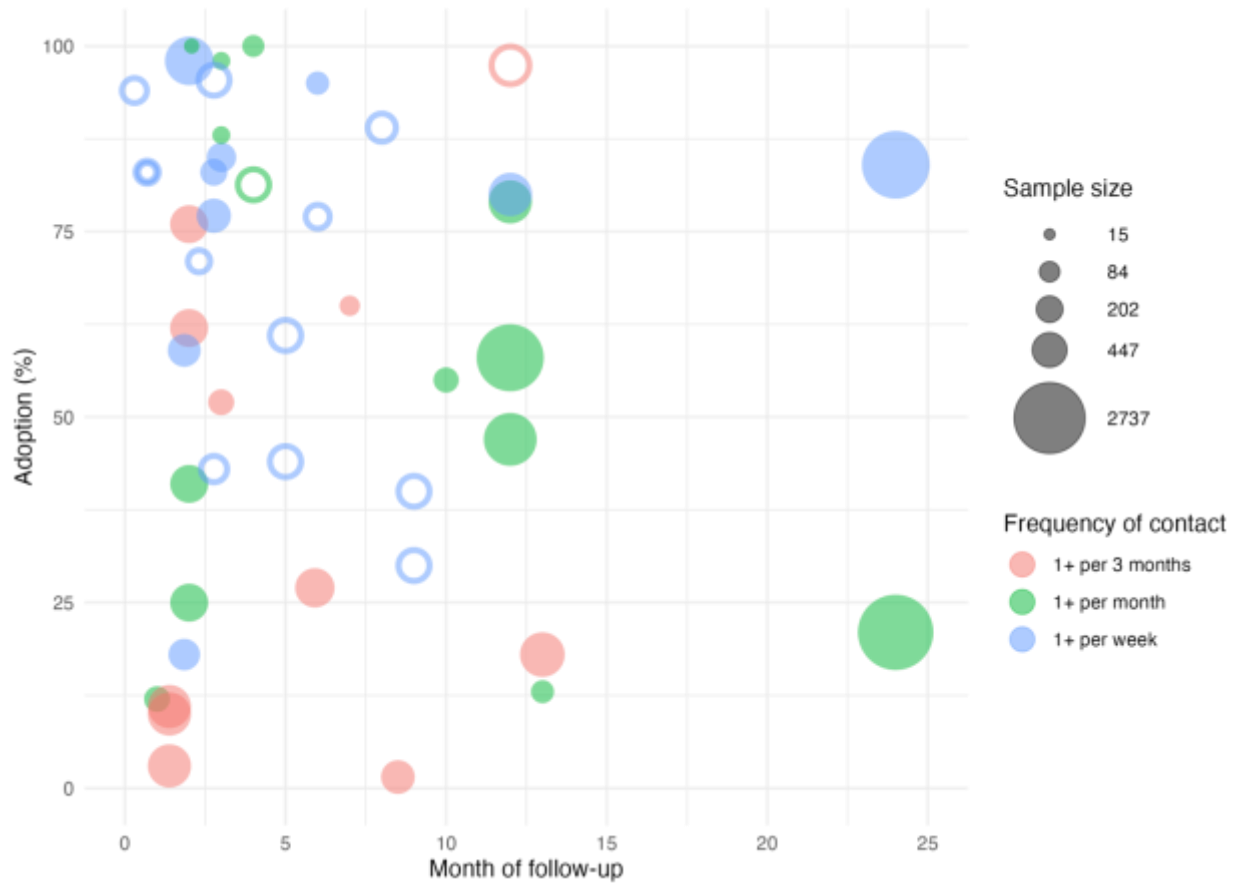

**Figure S3.** Last measured adoption over time by frequency of contact with study staff. The point sizes are scaled to indicate relative sample size (of the group(s) receiving chlorine only). Open circles indicate that the data point is reported as multiple adoption measures combined over the months of follow-up up until the time point shown. Closed circles are a single time-point result. This plot includes all groups listed in Table 1. Data are available in the Supplemental Excel File, Excel Table S1.

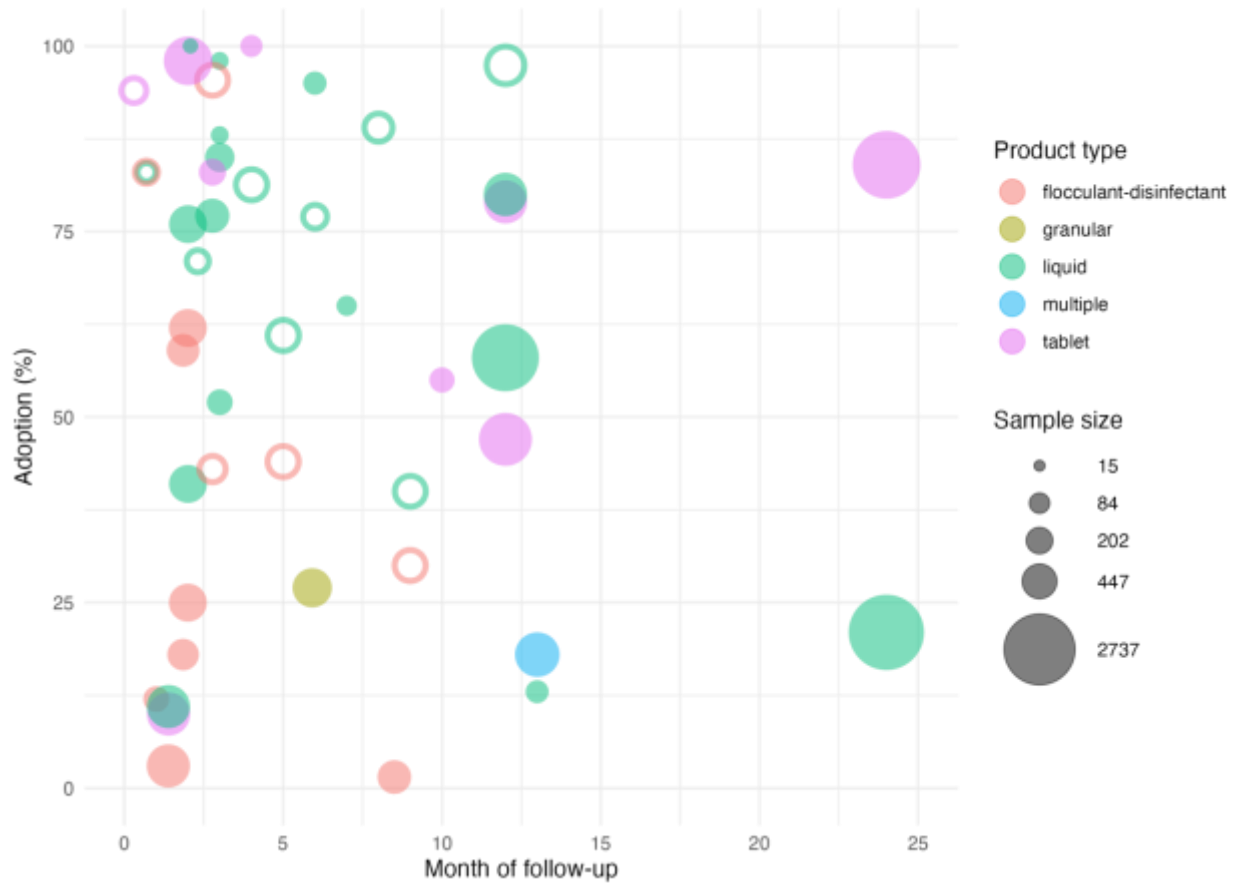

**Figure S4.** Last measured adoption over time by type of chlorine POU product. The point sizes are scaled to indicate relative sample size (of the group(s) receiving chlorine only). Open circles indicate that the data point is reported as multiple adoption measures combined over the months of follow-up up until the time point shown. Closed circles are a single time-point result. This plot includes all groups listed in Table 1. Data are available in the Supplemental Excel File, Excel Table S1.

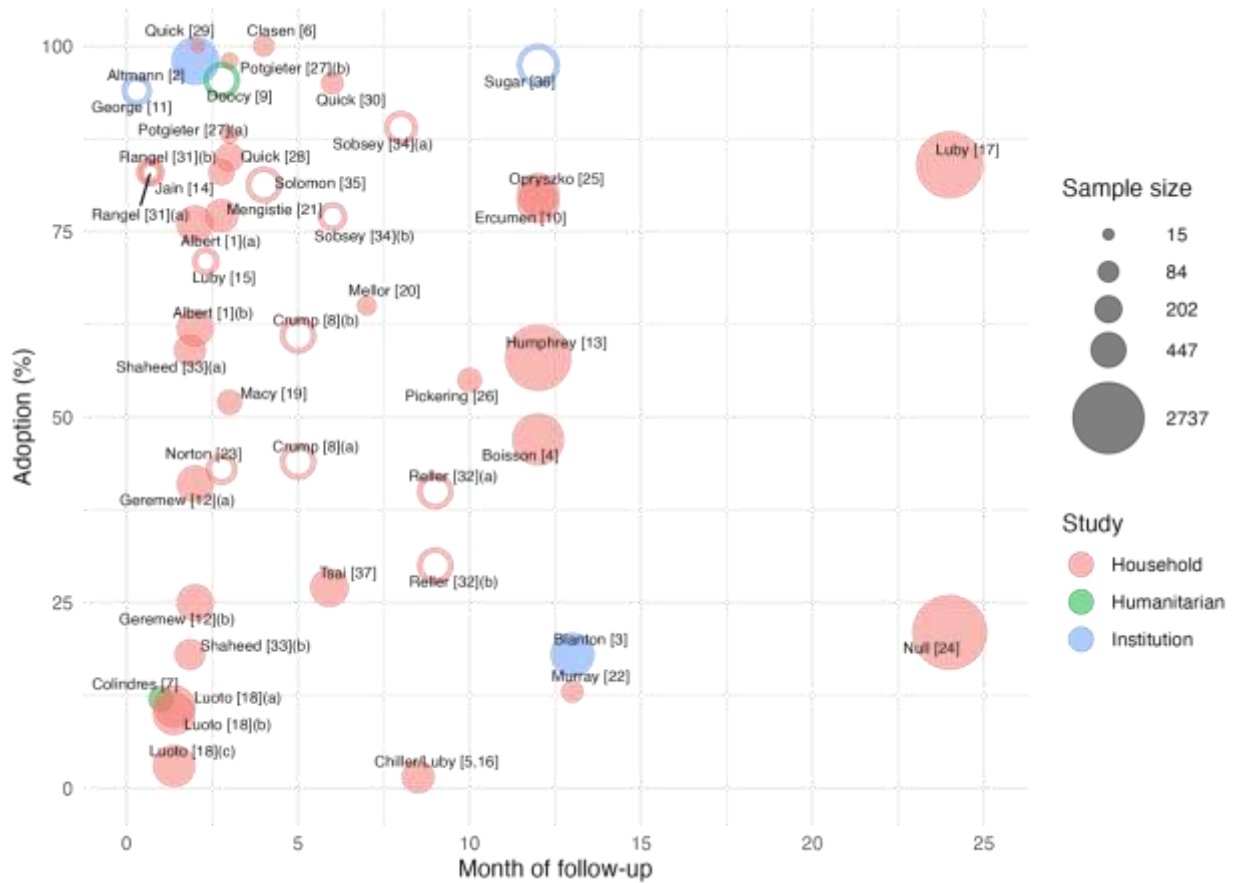

**Figure S5.** Last measured adoption over time by study location. “Institution” includes schools and health care facilities; “Humanitarian” includes an internally displaced persons camp and post-disaster relief. The point sizes are scaled to indicate relative sample size (of the group(s) receiving chlorine only). Open circles indicate that the data point is reported as multiple adoption measures combined over the months of follow-up up until the time point shown. Closed circles are a single time-point result. This plot includes all groups listed in Table 1. Data are available in the Supplemental Excel File, Excel Table S1.



**Table S1.** Summary data for Figure 3 (Weighted (by sample size) box plots showing relationship between contact frequency and final measured adoption)

| <b>Contact Frequency</b> | <b>25th percentile</b> | <b>Median</b> | <b>75th percentile</b> | <b>Mean</b> | <b>Standard deviation</b> |
|--------------------------|------------------------|---------------|------------------------|-------------|---------------------------|
| <b>1+ per 3 months</b>   | 3                      | 11            | 18                     | 14          | 11.6                      |
| <b>1+ per month</b>      | 21                     | 47            | 58                     | 42.7        | 21.1                      |
| <b>1+ per week</b>       | 71                     | 84            | 85                     | 76.2        | 21.4                      |

**Table S2.** Summary data for Figure S2 (Weighted (by sample size) box plots showing relationship between type of chlorine product and final measured adoption)

| <b>Product Category</b>        | <b>25th percentile</b> | <b>Median</b> | <b>75th percentile</b> | <b>Mean</b> | <b>Standard deviation</b> |
|--------------------------------|------------------------|---------------|------------------------|-------------|---------------------------|
| <b>tablet</b>                  | 47                     | 84            | 84                     | 70.2        | 26.8                      |
| <b>liquid</b>                  | 21                     | 41            | 58                     | 42.3        | 23.9                      |
| <b>flocculant-disinfectant</b> | 3                      | 25            | 44                     | 29          | 27.9                      |
| <b>granular</b>                | NA                     | 27            | NA                     | 27          | 0                         |
| <b>multiple</b>                | NA                     | 18            | NA                     | 18          | 0                         |

## References

1. Albert J, Luoto J, Levine D. 2010. End-user preferences for and performance of competing POU water treatment technologies among the rural poor of Kenya. *Environ Sci Technol* 44: 4426–4432.
2. Altmann M, Altare C, van der Spek N, Barbiche J-C, Dodos J, Bechir M, et al. 2018. Effectiveness of a Household Water, Sanitation and Hygiene Package on an Outpatient Program for Severe Acute Malnutrition: A Pragmatic Cluster-Randomized Controlled Trial in Chad. *Am J Trop Med Hyg* 98: 1005–1012.
3. Blanton E, Ombeki S, Oluoch GO, Mwaki A, Wannemuehler K, Quick R. 2010. Evaluation of the role of school children in the promotion of point-of-use water treatment and handwashing in schools and households--Nyanza Province, Western Kenya, 2007. *Am J Trop Med Hyg* 82: 664–671.
4. Boisson S, Stevenson M, Shapiro L, Kumar V, Singh LP, Ward D, et al. 2013. Effect of household-based drinking water chlorination on diarrhoea among children under five in Orissa, India: a double-blind randomised placebo-controlled trial. *PLoS Med* 10: e1001497.
5. Chiller TM, Mendoza CE, Lopez MB, Alvarez M, Hoekstra RM, Keswick BH, et al. 2006. Reducing diarrhoea in Guatemalan children: randomized controlled trial of flocculant-disinfectant for drinking-water. *Bull World Health Organ* 84: 28–35.
6. Clasen T, Saeed TF, Edmondson P, Boisson S, Shipin O. 2007. Household Water Treatment Using Sodium Dichloroisocyanurate (NaDCC) Tablets: A Randomized, Controlled Trial to Assess Microbiological Effectiveness in Bangladesh. *The American Journal of Tropical Medicine and Hygiene* 76:187–192; doi:10.4269/ajtmh.2007.76.187.
7. Colindres RE, Jain S, Bowen A, Mintz E, Domond P. 2007. After the flood: an evaluation of in-home drinking water treatment with combined flocculent-disinfectant following Tropical Storm Jeanne — Gonaives, Haiti, 2004. *Journal of Water and Health* 5:367–374; doi:10.2166/wh.2007.032.
8. Crump JA, Otieno PO, Slutsker L, Keswick BH, Rosen DH, Hoekstra RM, et al. 2005. Household based treatment of drinking water with flocculant-disinfectant for preventing diarrhoea in areas with turbid source water in rural western Kenya: cluster randomised controlled trial. *BMJ* 331: 478.
9. Doocy S, Burnham G. 2006. Point-of-use water treatment and diarrhoea reduction in the emergency context: an effectiveness trial in Liberia. *Trop Med Int Health* 11: 1542–1552.
10. Ercumen A, Naser AM, Unicomb L, Arnold BF, Colford JM Jr, Luby SP. 2015. Effects of Source- versus Household Contamination of Tubewell Water on Child Diarrhea in Rural Bangladesh: A Randomized Controlled Trial. *PLOS ONE* 10:e0121907; doi:10.1371/journal.pone.0121907.
11. George CM, Jung DS, Saif-Ur-Rahman KM, Monira S, Sack DA, Mahamud-ur Rashid, et al. 2016. Sustained Uptake of a Hospital-Based Handwashing with Soap and Water Treatment Intervention (Cholera-Hospital-Based Intervention for 7 Days [CHoBI7]): A Randomized Controlled Trial. *Am J Trop Med Hyg* 94: 428–436.
12. Geremew A, Mengistie B, Mellor J, Lantagne DS, Alemayehu E, Sahilu G. 2019. Consistent point-of-use water chlorination among households using unimproved water sources and treatment preference in Eastern Ethiopia. *Int J Environ Health Res* 29: 686–701.
13. Humphrey JH, Mbuya MNN, Ntozini R, Moulton LH, Stoltzfus RJ, Tavengwa NV, et al. 2019. Independent and combined effects of improved water, sanitation, and hygiene, and improved complementary feeding, on child stunting and anaemia in rural Zimbabwe: a cluster-randomised trial. *Lancet Glob Health* 7: e132–e147.
14. Jain S, Sahanoon OK, Blanton E, Schmitz A, Wannemuehler KA, Hoekstra RM, et al. 2010. Sodium Dichloroisocyanurate Tablets for Routine Treatment of Household Drinking Water in Periurban Ghana: A Randomized Controlled Trial. *Am J Trop Med Hyg* 82: 16–22.
15. Luby S, Agboatwalla M, Raza A, Sobel J, Mintz E, Baier K, et al. 2001. A low-cost intervention for cleaner drinking water in Karachi, Pakistan. *Int J Infect Dis* 5: 144–150.
16. Luby SP, Mendoza C, Keswick BH, Chiller TM, Hoekstra RM. 2008. Difficulties in bringing point-of-use water treatment to scale in rural Guatemala. *Am J Trop Med Hyg* 78: 382–387.
17. Luby SP, Rahman M, Arnold BF, Unicomb L, Ashraf S, Winch PJ, et al. 2018. Effects of water quality, sanitation, handwashing, and nutritional interventions on diarrhoea and child growth in rural Bangladesh: a cluster randomised controlled trial. *Lancet Glob Health* 6: e302–e315.

18. Luoto J, Najnin N, Mahmud M, Albert J, Islam MS, Luby S, et al. 2011. What point-of-use water treatment products do consumers use? Evidence from a randomized controlled trial among the urban poor in Bangladesh. *PLoS One* 6: e26132.
19. Macy JT, Quick RE. 1998. Evaluation of a novel drinking water treatment and storage intervention in Nicaragua. *Rev Panam Salud Publica* 3: 135–136.
20. Mellor JE, Kallman Erin, Oyanedel-Craver Vinka, Smith James A. 2015. Comparison of Three Household Water Treatment Technologies in San Mateo Ixtatán, Guatemala. *J Environ Eng* 141: 04014085.
21. Mengistie B, Berhane Y, Worku A. 2013. Household Water Chlorination Reduces Incidence of Diarrhea among Under-Five Children in Rural Ethiopia: A Cluster Randomized Controlled Trial. *PLoS ONE* 8:e77887; doi:10.1371/journal.pone.0077887.
22. Murray AL, Napotnik JA, Rayner JS, Mendoza A, Mitro B, Norville J, et al. 2020. Evaluation of consistent use, barriers to use, and microbiological effectiveness of three prototype household water treatment technologies in Haiti, Kenya, and Nicaragua. *Sci Total Environ* 718: 134685.
23. Norton DM, Rahman M, Shane AL, Hossain Z, Kulick RM, Bhuiyan MI, et al. 2009. Flocculant-disinfectant point-of-use water treatment for reducing arsenic exposure in rural Bangladesh. *Int J Environ Health Res* 19: 17–29.
24. Null C, Stewart CP, Pickering AJ, Dentz HN, Arnold BF, Arnold CD, et al. 2018. Effects of water quality, sanitation, handwashing, and nutritional interventions on diarrhoea and child growth in rural Kenya: a cluster-randomised controlled trial. *Lancet Glob Health* 6: e316–e329.
25. Opryszko MC, Majeed SW, Hansen PM, Myers JA, Baba D, Thompson RE, et al. 2010. Water and hygiene interventions to reduce diarrhoea in rural Afghanistan: a randomized controlled study. *J Water Health* 8: 687–702.
26. Pickering AJ, Crider Y, Amin N, Bauza V, Unicomb L, Davis J, et al. 2015. Differences in Field Effectiveness and Adoption between a Novel Automated Chlorination System and Household Manual Chlorination of Drinking Water in Dhaka, Bangladesh: A Randomized Controlled Trial. *PLoS One* 10: e0118397.
27. Potgieter N, Becker PJ, Ehlers MM. 2009. Evaluation of the CDC safe water-storage intervention to improve the microbiological quality of point-of-use drinking water in rural communities in South Africa. *Water SA* 35; doi:10.4314/wsa.v35i4.76810.
28. Quick RE, Kimura A, Thevos A, Tembo M, Shamputa I, Hutwagner L, et al. 2002. Diarrhea prevention through household-level water disinfection and safe storage in Zambia. *Am J Trop Med Hyg* 66: 584–589.
29. Quick RE, Venczel LV, González O, Mintz ED, Highsmith AK, Espada A, et al. 1996. Narrow-mouthed water storage vessels and in situ chlorination in a Bolivian community: a simple method to improve drinking water quality. *Am J Trop Med Hyg* 54: 511–516.
30. Quick RE, Venczel LV, Mintz ED, Soleto L, Aparicio J, Gironaz M, et al. 1999. Diarrhoea prevention in Bolivia through point-of-use water treatment and safe storage: a promising new strategy. *Epidemiol Infect* 122: 83–90.
31. Rangel JM, Lopez B, Mejia MA, Mendoza C, Luby S. 2003. A novel technology to improve drinking water quality: a microbiological evaluation of in-home flocculation and chlorination in rural Guatemala. *J Water Health* 1: 15–22.
32. Reller ME, Mendoza CE, Lopez MB, Alvarez M, Hoekstra RM, Olson CA, et al. 2003. A randomized controlled trial of household-based flocculant-disinfectant drinking water treatment for diarrhea prevention in rural Guatemala. *Am J Trop Med Hyg* 69: 411–419.
33. Shaheed A, Rathore S, Bastable A, Bruce J, Cairncross S, Brown J. 2018. Adherence to Point-of-Use Water Treatment over Short-Term Implementation: Parallel Crossover Trials of Flocculation–Disinfection Sachets in Pakistan and Zambia. *Environ Sci Technol* 52: 6601–6609.
34. Sobsey MD, Handzel T, Venczel L. 2003. Chlorination and safe storage of household drinking water in developing countries to reduce waterborne disease. *Water Sci Technol* 47: 221–228.
35. Solomon ET, Robele S, Kloos H, Mengistie B. 2020. Effect of household water treatment with chlorine on diarrhea among children under the age of five years in rural areas of Dire Dawa, eastern Ethiopia: a cluster randomized controlled trial. *Infect Dis Poverty* 9: 64.
36. Sugar NR, Schilling KA, Kim S, Ahmed A, Ngui Muyanga D, Sivapalasingam S, et al. 2017. Integrating Household Water Treatment, Hand Washing, and Insecticide-Treated Bed Nets Into Pediatric HIV Care in Mombasa, Kenya: Impact on Diarrhea and Malaria Risk. *J Acquir Immune Defic Syndr* 76: 266–272.

37. Tsai F-J, Wu M, Lin C-P. 2020. Does a Free-Trial Approach Increase Purchase and Use of a Household Water Treatment and Safe Storage Product in Rural Haiti? *Am J Trop Med Hyg* 102: 518–525.
38. World Bank. 2019. World Bank Country and Lending Groups – World Bank Data Help Desk. Retrieved September 26, 2022, from <https://datahelpdesk.worldbank.org/knowledgebase/articles/906519-world-bank-country-and-lending-groups>
