# Supplementary material
Source: PubMed Central journal article supplement (PMC9885856)
Supplement: ehp10839.smcontents.508.pdf [file ehp10839.smcontents.508.pdf]

**Note to readers with disabilities:** *EHP* strives to ensure that all journal content is accessible to all readers. However, some figures and Supplemental Material published in *EHP* articles may not conform to [508 standards](#) due to the complexity of the information being presented. If you need assistance accessing journal content, please contact [ehp508@niehs.nih.gov](mailto:ehp508@niehs.nih.gov). Our staff will work with you to assess and meet your accessibility needs within 3 working days.

## **Supplemental Material**

### **Adoption of Point-of-Use Chlorination for Household Drinking Water Treatment: A Systematic Review**

Yoshika S. Crider, Miki Tsuchiya, Magnifique Mukundwa, Isha Ray, and Amy J. Pickering

#### **Table of Contents**

##### **Full search terms**

**Figure S1.** PRISMA flow diagram.

**Figure S2.** Weighted box plots showing the relationship between the type of chlorine product and final measured adoption, restricted to only groups that used free chlorine residual (FCR) or total chlorine to measure adoption. This excludes Opryszko et al (2010), Albert et al (2010), and Sugar et al (2017). Dots show each group average. Groups were weighted by sample size to calculate the 25th, 50th, and 75th percentiles displayed above as the midline and box limits. The whiskers extend to data within 1.5 times the interquartile range (IQR) above and below the 75<sup>th</sup> and 25<sup>th</sup> percentiles. This includes studies that report single-time-point and pooled adoption measures. Summary data are presented in Table S2.

**Figure S3.** Last measured adoption over time by frequency of contact with study staff. The point sizes are scaled to indicate relative sample size (of the group(s) receiving chlorine only). Open circles indicate that the data point is reported as multiple adoption measures combined over the months of follow-up up until the time point shown. Closed circles are a single time-point result. This plot includes all groups listed in Table 1. Data are available in the Supplemental Excel File, Excel Table S1.

**Figure S4.** Last measured adoption over time by type of chlorine POU product. The point sizes are scaled to indicate relative sample size (of the group(s) receiving chlorine only). Open circles indicate that the data point is reported as multiple adoption measures combined over the months of follow-up up until the time point shown. Closed circles are a single time-point result. This plot includes all groups listed in Table 1. Data are available in the Supplemental Excel File, Excel Table S1.

**Figure S5.** Last measured adoption over time by study location. “Institution” includes schools and health care facilities; “Humanitarian” includes an internally displaced persons camp and post-disaster relief. The point sizes are scaled to indicate relative sample size (of the group(s) receiving chlorine only). Open circles indicate that the data point is reported as multiple adoption measures combined over the months of follow-up up until the time point shown. Closed circles are a single time-point result. This plot includes all groups listed in Table 1. Data are available in the Supplemental Excel File, Excel Table S1.

**Table S1.** Summary data for Figure 3 (Weighted (by sample size) box plots showing relationship between contact frequency and final measured adoption).

**Table S2.** Summary data for Figure S2 (Weighted (by sample size) box plots showing relationship between type of chlorine product and final measured adoption).

## References

**Additional File-** Excel Document
